# Supplementary material for: Chemical Diversity and Potential Target Network of Woody Peony Flower Essential Oil from Eleven Representative Cultivars (Paeonia × suffruticosa Andr.)
Source: MDPI journal article supplement (doi:10.3390/molecules27092829), 2022-04-29
Supplement: s1 [file s1]

*Supplementary Materials*

**Chemical diversity and potential target network of woody peony flower essential oil from eleven representative cultivars (*Paeonia* × *suffruticosa* Andr.)**

**Gaoming Lei \*, Chaoying Song, Xinyue Wen, Guoyu Gao and Yanjie Qi**

Department of Pharmaceutical Sciences, School of Basic Medical Sciences,  
Henan University of Science and Technology, 471023, Luoyang, China;  
200320201100@stu.haust.edu.cn (C.S.); 191418030220@stu.haust.edu.cn (X.W.);  
191418030201@stu.haust.edu.cn (G.G.); 171415020114@stu.haust.edu.cn (Y.Q.)

\* Correspondence: leigm@haust.edu.cn

## **Legends**

Table S1. Results of drug likeness screening for the 45 essential oil compounds

Table S2. The list of the 190 predictive potential targets for the 20 essential oil compounds

Table S3. Main topological parameters for the total network of protein – protein interactions

## **References**

**Table S1.** Results of drug likeness screening for the 45 essential oil compounds <sup>a</sup>

| No. <sup>b</sup> | Compound                       | Results on Lipinski's rule <sup>c</sup> | BBB permeant <sup>d</sup> |
|------------------|--------------------------------|-----------------------------------------|---------------------------|
| 1                | Octane                         | Lipinski: 1 violation: MLOGP>4.15       | Yes                       |
| 2                | Hexanal                        | Lipinski: 0 violation                   | Yes                       |
| 4                | cis-3-Hexen-1-ol               | Lipinski: 0 violation                   | Yes                       |
| 6                | 1-Hexanol                      | Lipinski: 0 violation                   | Yes                       |
| 15               | trans- $\beta$ -Ocimene        | Lipinski: 0 violation                   | Yes                       |
| 17               | cis-Linalool oxide furan       | Lipinski: 0 violation                   | Yes                       |
| 18               | trans-Linalool oxide furan     | Lipinski: 0 violation                   | Yes                       |
| 20               | Nonanal                        | Lipinski: 0 violation                   | Yes                       |
| 21               | Linalool                       | Lipinski: 0 violation                   | Yes                       |
| 22               | cis-Rose oxide                 | Lipinski: 0 violation                   | Yes                       |
| 24               | Benzeneethanol                 | Lipinski: 0 violation                   | Yes                       |
| 26               | Hydroquinone dimethyl ether    | Lipinski: 0 violation                   | Yes                       |
| 32               | 4,7-Dimethylbenzofuran         | Lipinski: 0 violation                   | Yes                       |
| 33               | Nerol                          | Lipinski: 0 violation                   | Yes                       |
| 34               | Citronellol                    | Lipinski: 0 violation                   | Yes                       |
| 35               | Neral                          | Lipinski: 0 violation                   | Yes                       |
| 36               | Geraniol                       | Lipinski: 0 violation                   | Yes                       |
| 37               | Geranial                       | Lipinski: 0 violation                   | Yes                       |
| 41               | Citronellyl acetate            | Lipinski: 0 violation                   | Yes                       |
| 44               | Geranic acid                   | Lipinski: 0 violation                   | Yes                       |
| 45               | Tetradecane                    | Lipinski: 1 violation: MLOGP>4.15       | No                        |
| 47               | Phloroglucinol trimethyl ether | Lipinski: 0 violation                   | Yes                       |
| 49               | 2,6,10-Trimethyltridecane      | Lipinski: 1 violation: MLOGP>4.15       | No                        |
| 51               | Germacrene D                   | Lipinski: 1 violation: MLOGP>4.15       | No                        |
| 53               | Pentadecane                    | Lipinski: 1 violation: MLOGP>4.15       | No                        |
| 54               | $\alpha$ -Farnesene            | Lipinski: 1 violation: MLOGP>4.15       | No                        |
| 63               | Hexadecane                     | Lipinski: 1 violation: MLOGP>4.15       | No                        |
| 65               | 2-Methylhexadecane             | Lipinski: 1 violation: MLOGP>4.15       | No                        |
| 66               | 6,9-Heptadecadiene             | Lipinski: 1 violation: MLOGP>4.15       | No                        |
| 67               | trans-8-Heptadecene            | Lipinski: 1 violation: MLOGP>4.15       | No                        |
| 68               | Heptadecane                    | Lipinski: 1 violation: MLOGP>4.15       | No                        |
| 71               | Octadecane                     | Lipinski: 1 violation: MLOGP>4.15       | No                        |
| 76               | 9-Nonadecene                   | Lipinski: 1 violation: MLOGP>4.15       | No                        |
| 77               | 1,18-Nonadecadiene             | Lipinski: 1 violation: MLOGP>4.15       | No                        |
| 78               | 1-Nonadecene                   | Lipinski: 1 violation: MLOGP>4.15       | No                        |
| 79               | Nonadecane                     | Lipinski: 1 violation: MLOGP>4.15       | No                        |
| 80               | 2-Heptadecanol                 | Lipinski: 1 violation: MLOGP>4.15       | No                        |
| 90               | Heneicosane                    | Lipinski: 1 violation: MLOGP>4.15       | No                        |
| 92               | Docosane                       | Lipinski: 1 violation: MLOGP>4.15       | No                        |
| 96               | Tricosane                      | Lipinski: 1 violation: MLOGP>4.15       | No                        |
| 97               | 3-Methyltricosane              | Lipinski: 1 violation: MLOGP>4.15       | No                        |
| 98               | Tetracosane                    | Lipinski: 1 violation: MLOGP>4.15       | No                        |

|     |                     |                                   |    |
|-----|---------------------|-----------------------------------|----|
| 100 | Pentacosane         | Lipinski: 1 violation: MLOGP>4.15 | No |
| 101 | 3-Methylpentacosane | Lipinski: 1 violation: MLOGP>4.15 | No |
| 104 | Heptacosane         | Lipinski: 1 violation: MLOGP>4.15 | No |

<sup>a</sup> Essential oil components with percentages lower than 1.0% in all samples were excluded, which afforded 45 compounds; <sup>b</sup> Numbering of the essential oil compounds, see Table 2; <sup>c</sup> Drug likeness screening was performed on SwissADME using Lipinski's rule (<http://www.swissadme.ch/>, accessed on 2 April 2021) [1]; <sup>d</sup> Predictive results on blood brain barrier (BBB) permeation.

**Table S2.** The list of the 190 predictive potential targets for the 20 essential oil compounds <sup>a</sup>

| <b>Target <sup>b</sup></b> | <b>Swiss-Prot ID <sup>c</sup></b> |
|----------------------------|-----------------------------------|
| ACHE                       | P22303                            |
| ADA                        | P00813                            |
| ADH1A                      | P07327                            |
| ADH1B                      | P00325                            |
| ADH1C                      | P00326                            |
| ADH7                       | P40394                            |
| ADRA1D                     | P25100                            |
| AKR1B1                     | P15121                            |
| ALDH1A1                    | P00352                            |
| ALDH1A3                    | P47895                            |
| ALOX5                      | P09917                            |
| AOC3                       | Q16853                            |
| APAF1                      | O14727                            |
| APOBEC3G                   | Q9HC16                            |
| AR                         | P10275                            |
| ATP12A                     | P54707                            |
| BCHE                       | P06276                            |
| BRD4                       | O60885                            |
| CA1                        | P00915                            |
| CA12                       | O43570                            |
| CA13                       | Q8N1Q1                            |
| CA14                       | Q9ULX7                            |
| CA2                        | P00918                            |
| CA4                        | P22748                            |
| CA5A                       | P35218                            |
| CA7                        | P43166                            |
| CA9                        | Q16790                            |
| CACNB1                     | Q02641                            |
| CACNG2                     | Q9Y698                            |
| CDC25A                     | P30304                            |
| CDC25B                     | P30305                            |
| CDK5R1                     | Q15078                            |
| CEL                        | P19835                            |
| CES1                       | P23141                            |
| CES2                       | O00748                            |
| CHRM1                      | P11229                            |
| CHRM2                      | P08172                            |
| CHRM3                      | P20309                            |
| CHRM4                      | P08173                            |
| CHRM5                      | P08912                            |
| CHRNA1                     | P02708                            |

---

|         |        |
|---------|--------|
| CHRNA3  | P32297 |
| CHRNA4  | P43681 |
| CHRNA2  | P17787 |
| CNR1    | P21554 |
| CNR2    | P34972 |
| CRHBP   | P24387 |
| CTRC    | Q99895 |
| CTSB    | P07858 |
| CTSK    | P43235 |
| CTSL    | P07711 |
| CYP11B1 | P15538 |
| CYP11B2 | P19099 |
| CYP17A1 | P05093 |
| CYP19A1 | P11511 |
| CYP2A6  | P11509 |
| CYP2C19 | P33261 |
| DAO     | P14920 |
| DHRS3   | O75911 |
| DHRS4   | Q9BTZ2 |
| DNM1    | Q05193 |
| DPP4    | P27487 |
| DPP7    | Q9UHL4 |
| DPP8    | Q6V1X1 |
| DRD2    | P14416 |
| DRD4    | P21917 |
| EGFR    | P00533 |
| ESR1    | P03372 |
| FAAH    | O00519 |
| FFAR1   | O14842 |
| FKBP1A  | P62942 |
| GABRA1  | P14867 |
| GABRA2  | P47869 |
| GABRD   | O14764 |
| GAMT    | Q14353 |
| GLI1    | P08151 |
| GLI2    | P10070 |
| GPBAR1  | Q8TDU6 |
| GRIA4   | P48058 |
| GRIN3A  | Q8TCU5 |
| GRM1    | Q13255 |
| GRM4    | Q14833 |
| GSK3B   | P49841 |
| GSR     | P00390 |
| HCAR2   | Q8TDS4 |

---

---

|          |        |
|----------|--------|
| HMGCR    | P04035 |
| HSD11B1  | P28845 |
| HSD17B2  | P37059 |
| HSD17B3  | P37058 |
| HTR1A    | P08908 |
| HTR2A    | P28223 |
| HTR2C    | P28335 |
| HTR3A    | P46098 |
| IDO1     | P14902 |
| IKBKB    | O14920 |
| JAK1     | P23458 |
| JAK2     | O60674 |
| KCNA1    | Q09470 |
| KCNA10   | Q16322 |
| KCNA2    | P16389 |
| KCNA3    | P22001 |
| KCNC3    | Q14003 |
| KCND1    | Q9NSA2 |
| KCNH2    | Q12809 |
| JMJD2C   | Q9H3R0 |
| LACTB    | P83111 |
| LRRK2    | Q5S007 |
| LTA4H    | P09960 |
| MAOA     | P21397 |
| MAOB     | P27338 |
| MAPKAPK2 | P49137 |
| MCL1     | Q07820 |
| MGLL     | Q99685 |
| MIF      | P14174 |
| MPI      | P34949 |
| MPO      | P05164 |
| MTNR1A   | P48039 |
| NCF1     | P14598 |
| NOS1     | P29475 |
| NOS2     | P35228 |
| NOTUM    | Q6P988 |
| NQO1     | P15559 |
| NQO2     | P16083 |
| NR0B1    | P51843 |
| NR1H4    | Q96RI1 |
| NR1I3    | Q14994 |
| NR3C1    | P04150 |
| NR3C2    | P08235 |
| OPRK1    | P41145 |

---

---

|         |        |
|---------|--------|
| OPRM1   | P35372 |
| PARP1   | P09874 |
| PDE10A  | Q9Y233 |
| PDE3A   | Q14432 |
| PDE4A   | P27815 |
| PDE4B   | Q07343 |
| PDE5A   | O76074 |
| PDE7A   | Q13946 |
| PDGFRA  | P16234 |
| PGR     | P06401 |
| PIK3CG  | P48736 |
| PNMT    | P11086 |
| PPARA   | Q07869 |
| PPARG   | P37231 |
| PPM1B   | O75688 |
| PRF1    | P14222 |
| PRKAB1  | Q9Y478 |
| PRKDC   | P78527 |
| PTAFR   | P25105 |
| PTGER2  | P43116 |
| PTGER3  | P43115 |
| PTGES   | O14684 |
| PTGS1   | P23219 |
| PTGS2   | P35354 |
| PTPN1   | P18031 |
| RARG    | P13631 |
| RARRES1 | P49788 |
| RBP1    | P09455 |
| RBP3    | P10745 |
| RDH11   | Q8TC12 |
| RDH12   | Q96NR8 |
| RDH13   | Q8NBN7 |
| RDH5    | Q92781 |
| RETSAT  | Q6NUM9 |
| RXRB    | P28702 |
| SAE1    | Q9UBE0 |
| SHH     | Q15465 |
| SIGMAR1 | Q99720 |
| SLC1A2  | P43004 |
| SLC6A2  | P23975 |
| SLC6A3  | Q01959 |
| SLC6A4  | P31645 |
| SLC8A1  | P32418 |
| SQLE    | Q14534 |

---



---

|         |        |
|---------|--------|
| SRD5A1  | P18405 |
| SRD5A2  | P31213 |
| STS     | P08842 |
| TAAR1   | Q96RJ0 |
| TAS2R31 | P59538 |
| TBXAS1  | P24557 |
| THRA    | P10827 |
| TPO     | P07202 |
| TRPA1   | O75762 |
| TRPM8   | Q7Z2W7 |
| VR1     | Q8NER1 |
| TRPV3   | Q8NET8 |
| TTR     | P02766 |
| TYMP    | P19971 |
| UGT2B17 | O75795 |
| UGT2B7  | P16662 |
| XDH     | P47989 |

---

<sup>a</sup> The 20 essential oil compounds, see Table 3; <sup>b</sup> The standard gene name representative of each target; <sup>c</sup> The target ID according to UniProt (<https://www.uniprot.org/>, accessed on 28 May 2021) [2].

**Table S3.** Main topological parameters for the total network of protein – protein interactions <sup>a</sup>

| <b>Target</b> | <b>Degree</b> | <b>Closeness centrality</b> | <b>Betweenness centrality</b> |
|---------------|---------------|-----------------------------|-------------------------------|
| DRD2          | 40            | 0.4764                      | 6.585E-02                     |
| PTGS2         | 39            | 0.4946                      | 0.1087                        |
| EGFR          | 36            | 0.4932                      | 0.1172                        |
| HTR1A         | 34            | 0.4516                      | 2.976E-02                     |
| CNR1          | 32            | 0.4561                      | 3.562E-02                     |
| ESR1          | 31            | 0.4573                      | 5.813E-02                     |
| CHRNA4        | 30            | 0.4344                      | 2.855E-02                     |
| NR3C1         | 29            | 0.4815                      | 7.292E-02                     |
| MAOA          | 29            | 0.4483                      | 3.270E-02                     |
| OPRM1         | 29            | 0.4472                      | 2.152E-02                     |
| AR            | 28            | 0.4417                      | 4.227E-02                     |
| ACHE          | 26            | 0.4450                      | 3.288E-02                     |
| OPRK1         | 26            | 0.4203                      | 1.342E-02                     |
| MAOB          | 25            | 0.4303                      | 2.267E-02                     |
| DRD4          | 25            | 0.4194                      | 4.777E-03                     |
| SLC6A4        | 24            | 0.4407                      | 1.867E-02                     |
| HTR3A         | 24            | 0.4213                      | 2.218E-02                     |
| CHRM2         | 23            | 0.4354                      | 2.374E-02                     |
| HTR2A         | 23            | 0.4344                      | 1.856E-02                     |
| CYP19A1       | 22            | 0.4461                      | 2.816E-02                     |
| ADRA1D        | 22            | 0.4072                      | 1.416E-02                     |
| GRM1          | 22            | 0.3939                      | 9.858E-03                     |
| PPARG         | 21            | 0.4655                      | 4.443E-02                     |
| CNR2          | 21            | 0.4146                      | 7.336E-03                     |
| SLC6A3        | 21            | 0.4136                      | 1.775E-02                     |
| ALDH1A1       | 21            | 0.4081                      | 4.246E-02                     |
| GRM4          | 21            | 0.4035                      | 8.782E-03                     |
| CHRM1         | 20            | 0.3856                      | 1.673E-02                     |
| PTGER3        | 19            | 0.4194                      | 1.712E-02                     |
| UGT2B7        | 19            | 0.4108                      | 1.900E-02                     |
| MPO           | 18            | 0.4213                      | 2.992E-02                     |
| CYP17A1       | 18            | 0.3922                      | 9.588E-03                     |
| HTR2C         | 18            | 0.3745                      | 6.382E-03                     |
| CHRM4         | 17            | 0.3897                      | 7.185E-03                     |
| UGT2B17       | 17            | 0.3848                      | 1.358E-02                     |
| VR1           | 16            | 0.4396                      | 1.841E-02                     |
| NOS2          | 16            | 0.4223                      | 2.303E-02                     |
| ADH1B         | 16            | 0.4146                      | 1.254E-02                     |
| GABRA1        | 16            | 0.3832                      | 1.158E-02                     |
| CYP2C19       | 15            | 0.4203                      | 2.260E-02                     |
| CHRNA2        | 15            | 0.3974                      | 4.442E-03                     |

---

|         |    |        |           |
|---------|----|--------|-----------|
| SLC6A2  | 15 | 0.3939 | 2.544E-03 |
| RBP1    | 15 | 0.3604 | 1.593E-02 |
| JAK2    | 14 | 0.4242 | 2.028E-02 |
| PGR     | 14 | 0.4184 | 6.220E-03 |
| ALDH1A3 | 14 | 0.4090 | 1.820E-02 |
| FAAH    | 14 | 0.4090 | 6.825E-03 |
| HCAR2   | 14 | 0.3832 | 2.477E-03 |
| GABRA2  | 14 | 0.3816 | 6.295E-03 |
| HSD17B2 | 14 | 0.3784 | 1.654E-03 |
| MTNR1A  | 14 | 0.3760 | 1.099E-02 |
| CYP2A6  | 13 | 0.4213 | 1.692E-02 |
| GSK3B   | 13 | 0.4018 | 5.702E-03 |
| PTGS1   | 13 | 0.3991 | 6.280E-03 |
| ADH7    | 13 | 0.3931 | 1.330E-02 |
| ADH1A   | 13 | 0.3922 | 7.722E-03 |
| TAS2R31 | 13 | 0.3753 | 0         |
| MGLL    | 12 | 0.4127 | 1.293E-02 |
| SLC1A2  | 12 | 0.4090 | 8.104E-03 |
| HSD11B1 | 12 | 0.3792 | 8.326E-03 |
| GRIA4   | 12 | 0.3760 | 4.955E-03 |
| CYP11B2 | 12 | 0.3597 | 1.328E-03 |
| SRD5A1  | 12 | 0.3583 | 9.870E-04 |
| SRD5A2  | 12 | 0.3576 | 8.690E-04 |
| HSD17B3 | 12 | 0.3576 | 8.550E-04 |
| PARP1   | 11 | 0.4174 | 1.190E-02 |
| PRKDC   | 11 | 0.3939 | 6.909E-03 |
| MCL1    | 11 | 0.3914 | 6.829E-03 |
| ALOX5   | 11 | 0.3914 | 4.897E-03 |
| NR0B1   | 11 | 0.3792 | 3.062E-03 |
| ADH1C   | 11 | 0.3745 | 3.790E-03 |
| FFAR1   | 11 | 0.3493 | 7.808E-03 |
| CYP11B1 | 11 | 0.3467 | 4.750E-04 |
| KCNA1   | 11 | 0.3346 | 1.541E-02 |
| NR1H4   | 10 | 0.3991 | 1.079E-02 |
| GLI1    | 10 | 0.3948 | 6.835E-03 |
| PTPN1   | 10 | 0.3914 | 3.312E-03 |
| AKR1B1  | 10 | 0.3906 | 6.510E-03 |
| NOS1    | 10 | 0.3897 | 5.260E-03 |
| CHRNA3  | 10 | 0.3872 | 2.248E-03 |
| BCHE    | 10 | 0.3832 | 7.582E-03 |
| CES1    | 10 | 0.3832 | 5.877E-03 |
| XDH     | 10 | 0.3800 | 8.545E-03 |
| SHH     | 10 | 0.3684 | 1.210E-02 |
| TRPA1   | 10 | 0.3655 | 1.640E-03 |

---

---

|         |    |        |           |
|---------|----|--------|-----------|
| NR3C2   | 10 | 0.3618 | 1.384E-03 |
| KCNA2   | 10 | 0.3576 | 1.366E-02 |
| CHRM5   | 10 | 0.3480 | 4.630E-04 |
| RDH12   | 10 | 0.3279 | 4.251E-03 |
| GSR     | 9  | 0.3922 | 4.504E-03 |
| PTGES   | 9  | 0.3776 | 2.922E-03 |
| GRIN3A  | 9  | 0.3626 | 1.398E-03 |
| PTAFR   | 9  | 0.3576 | 1.201E-03 |
| RDH11   | 9  | 0.3487 | 3.934E-03 |
| CHRM3   | 9  | 0.3370 | 6.400E-05 |
| RDH5    | 9  | 0.3285 | 2.868E-03 |
| LRRK2   | 8  | 0.3974 | 5.742E-03 |
| PPARA   | 8  | 0.3881 | 3.849E-03 |
| ADA     | 8  | 0.3760 | 1.837E-02 |
| TTR     | 8  | 0.3662 | 1.644E-02 |
| HMGCR   | 8  | 0.3626 | 1.410E-02 |
| CDC25A  | 8  | 0.3590 | 1.326E-03 |
| THRA    | 8  | 0.3576 | 3.490E-02 |
| TRPM8   | 8  | 0.3548 | 1.058E-03 |
| GABRD   | 8  | 0.3500 | 7.960E-04 |
| RETSAT  | 8  | 0.3149 | 1.005E-03 |
| RARG    | 7  | 0.3965 | 1.854E-02 |
| PNMT    | 7  | 0.3864 | 3.893E-03 |
| DAO     | 7  | 0.3655 | 3.619E-03 |
| CES2    | 7  | 0.3590 | 1.003E-03 |
| NR1I3   | 7  | 0.3555 | 2.149E-03 |
| JAK1    | 7  | 0.3520 | 1.030E-03 |
| DHRS4   | 7  | 0.3487 | 4.436E-03 |
| CACNG2  | 7  | 0.3434 | 4.268E-03 |
| KCNH2   | 7  | 0.3428 | 1.153E-02 |
| DHRS3   | 7  | 0.3199 | 4.140E-04 |
| DNM1    | 6  | 0.3906 | 1.987E-03 |
| PDE4A   | 6  | 0.3881 | 4.113E-03 |
| IDO1    | 6  | 0.3737 | 1.281E-02 |
| ATP12A  | 6  | 0.3730 | 1.254E-02 |
| GLI2    | 6  | 0.3611 | 3.330E-04 |
| RXRB    | 6  | 0.3534 | 4.624E-03 |
| DPP4    | 6  | 0.3514 | 1.090E-02 |
| TBXAS1  | 6  | 0.3500 | 1.290E-04 |
| TAAR1   | 6  | 0.3428 | 2.937E-03 |
| CDC25B  | 6  | 0.3402 | 7.370E-04 |
| GPBAR1  | 6  | 0.3377 | 2.965E-03 |
| CHRNA1  | 6  | 0.3352 | 1.860E-04 |
| SIGMAR1 | 6  | 0.3049 | 1.405E-02 |

---

|          |   |        |           |
|----------|---|--------|-----------|
| PIK3CG   | 5 | 0.3808 | 4.672E-03 |
| NQO1     | 5 | 0.3699 | 6.030E-04 |
| CDK5R1   | 5 | 0.3677 | 2.950E-03 |
| MAPKAPK2 | 5 | 0.3534 | 1.390E-03 |
| CTSB     | 5 | 0.3480 | 1.258E-02 |
| PTGER2   | 5 | 0.3473 | 2.753E-03 |
| PDGFRA   | 5 | 0.3473 | 4.120E-04 |
| STS      | 5 | 0.3440 | 4.003E-03 |
| FKBP1A   | 5 | 0.3383 | 7.174E-03 |
| LTA4H    | 5 | 0.3346 | 0         |
| NCF1     | 5 | 0.3327 | 5.520E-04 |
| DPP7     | 5 | 0.3262 | 6.046E-03 |
| MIF      | 4 | 0.3730 | 5.697E-03 |
| IKBKB    | 4 | 0.3507 | 8.580E-04 |
| CRHBP    | 4 | 0.3487 | 4.970E-04 |
| APAF1    | 4 | 0.3396 | 3.310E-05 |
| CEL      | 4 | 0.3389 | 1.191E-02 |
| PPM1B    | 4 | 0.3358 | 6.000E-04 |
| PDE5A    | 4 | 0.3333 | 2.540E-04 |
| CA2      | 4 | 0.3256 | 4.602E-03 |
| SQLE     | 4 | 0.3256 | 3.590E-03 |
| PDE4B    | 4 | 0.2984 | 4.900E-04 |
| CACNB1   | 4 | 0.2950 | 6.990E-04 |
| KCNA3    | 4 | 0.2839 | 2.600E-04 |
| CA9      | 3 | 0.3669 | 0         |
| TYMP     | 3 | 0.3583 | 1.386E-03 |
| BRD4     | 3 | 0.3460 | 9.520E-05 |
| AOC3     | 3 | 0.3339 | 0         |
| TRPV3    | 3 | 0.3171 | 0         |
| PRKAB1   | 3 | 0.3149 | 5.390E-04 |
| SLC8A1   | 3 | 0.3013 | 1.642E-03 |
| CTSK     | 3 | 0.2848 | 1.766E-03 |
| RBP3     | 3 | 0.2673 | 0         |
| CA7      | 2 | 0.3396 | 1.292E-03 |
| CA4      | 2 | 0.3285 | 0         |
| JMJD2C   | 2 | 0.3250 | 0         |
| GAMT     | 2 | 0.3171 | 3.520E-04 |
| MPI      | 2 | 0.3122 | 6.160E-04 |
| RARRES1  | 2 | 0.2931 | 1.220E-04 |
| DPP8     | 2 | 0.2696 | 0         |
| CTSL     | 2 | 0.2642 | 5.840E-04 |
| PDE10A   | 1 | 0.3233 | 0         |
| RDH13    | 1 | 0.2903 | 0         |
| NQO2     | 1 | 0.2737 | 0         |

|          |   |        |   |
|----------|---|--------|---|
| APOBEC3G | 1 | 0.2737 | 0 |
| PRF1     | 1 | 0.2725 | 0 |
| NOTUM    | 1 | 0.2696 | 0 |
| TPO      | 1 | 0.2684 | 0 |
| CA5A     | 1 | 0.2638 | 0 |
| CA14     | 1 | 0.2638 | 0 |
| CA13     | 1 | 0.2638 | 0 |
| CTRC     | 1 | 0.2535 | 0 |
| KCNA10   | 1 | 0.2510 | 0 |
| KCNC3    | 1 | 0.2339 | 0 |

<sup>a</sup> The total PPI network for the 190 targets identified 183 connected nodes and 7 disconnected ones. The disconnected nodes were not included. The analysis was performed on STRING (<https://cn.string-db.org/>, accessed on 4 June 2021) [3]. Targets are represented by their standard gene names. The network was analyzed by Cytoscape software [4].

## References

1. Daina, A.; Michielin, O.; Zoete, V. SwissADME: a free web tool to evaluate pharmacokinetics, drug-likeness and medicinal chemistry friendliness of small molecules. *Sci. Rep.* **2017**, *7*, 42717.
2. Consortium, T.U. UniProt: the universal protein knowledgebase in 2021. *Nucleic Acids Res.* **2020**, *49*, D480-D489.
3. Szklarczyk, D.; Gable, A.L.; Nastou, K.C.; Lyon, D.; Kirsch, R.; Pyysalo, S.; Doncheva, N.T.; Legeay, M.; Fang, T.; Bork, P.; et al. The STRING database in 2021: customizable protein–protein networks, and functional characterization of user-uploaded gene/measurement sets. *Nucleic Acids Res.* **2020**, *49*, D605-D612.
4. Shannon, P.; Markiel, A.; Ozier, O.; Baliga, N.S.; Wang, J.T.; Ramage, D.; Amin, N.; Schwikowski, B.; Ideker, T. Cytoscape: a software environment for integrated models of biomolecular interaction networks. *Genome Res.* **2003**, *13*, 2498-2504.
